# Supplementary material
Source: PubMed Central journal article supplement (PMC1157025)
Supplement: pnas_0500661102_1.pdf [file pnas_0500661102_1.pdf]

**Table 1.** Experimental techniques used to characterize the partially folded (molten globule) states of  $\alpha$ -lactalbumin

| Technique <sup>1</sup>                                                 | Source of protein <sup>2</sup>   | MG-generating conditions <sup>3</sup> | Refs.                               |
|------------------------------------------------------------------------|----------------------------------|---------------------------------------|-------------------------------------|
| Fluorescence                                                           |                                  |                                       |                                     |
| Stopped-flow fluorescence                                              | B                                | apo, A                                | 1, 2                                |
| ANS-bound fluorescence                                                 | H                                | A, P, apo, T                          | 3-6                                 |
| Fluorescence quenching / anisotropy                                    | rH                               | A                                     | 7                                   |
| Circular Dichroism                                                     |                                  |                                       |                                     |
| Steady-state CD                                                        | B, H                             | A, P, apo, T                          | 5, 8, 9                             |
| Stopped-flow CD                                                        | B, G                             | A, apo                                | 1, 2, 10-14                         |
| Viscometry                                                             | B, H                             | A, P, apo, T                          | 8, 9, 15                            |
| Oxidative-reductive disulfide bridge exchange                          | H, B / B                         | apo / T, P                            | 16-19 / 20-22                       |
| Differential scanning calorimetry                                      | H, B                             | A, apo                                | 8, 9, 15, 23 / 24-26 / 27 / 28 / 29 |
| Sequence deletion / substitution analysis                              |                                  |                                       |                                     |
| Domain-level studies                                                   | rH                               | (n.a.)                                | 30-32                               |
| Amino acid point mutations (incl. $\Phi$ -value analysis)              | rH / rG                          | (n.a.)                                | 33-38 / 39                          |
| Chimeric protein generation                                            | H, B                             | (n.a.)                                | 40-42                               |
| NMR Spectroscopy                                                       |                                  |                                       |                                     |
| <sup>1</sup> H NMR                                                     | B, GP                            | A, T                                  | 9, 43-45                            |
| 2D <sup>1</sup> H NOE                                                  | B, H, GP                         | A                                     | 43, 44, 46                          |
| Hydrogen Exchange                                                      | GP, B, rH / B                    | A / apo                               | 2, 47, 48 / 49                      |
| Steady-state CIDNP, EPR                                                | B                                | A, T / apo                            | 50 / 51                             |
| Real-time <sup>1</sup> H NMR / CIDNP NMR                               | B                                | apo / A                               | 2, 52-55                            |
| <sup>15</sup> N- <sup>1</sup> H HSQC NMR with progressive denaturation | rH, B, All-Ala, [28-111], others | A                                     | 56-61                               |
| NOE magnetization transfer                                             | B                                | A                                     | 62                                  |
| <sup>15</sup> N transverse relaxation rate measurements                | GP                               | A                                     | 63                                  |
| Water <sup>17</sup> O magnetic relaxation dispersion                   | B                                | A                                     | 64                                  |
| <sup>19</sup> F NMR                                                    | rH                               | A                                     | 65                                  |
| Pulse-labelled CIDNP                                                   | B, H                             | A, P, apo                             | 66 & this study                     |
| Limited proteolysis                                                    | B                                | A, apo                                | 67-69                               |
| IR and stopped-flow Fourier transform IR                               | B                                | A, apo                                | 9 / 70                              |
| Mass spectrometry (Hydrogen exchange)                                  | rH, [28-111], others             | A                                     | 71                                  |
| Synthetic peptide constructs                                           | H                                | A                                     | 72-76                               |
| Vibrational Raman optical activity                                     | B                                | A, apo                                | 77-79                               |
| Small angle X-ray scattering                                           | B                                | apo, A                                | 80, 81                              |
| Quasielastic neutron scattering                                        | B                                | A                                     | 82                                  |
| Chemical labeling                                                      | B                                | apo, A                                | 83, 84                              |
| Hydrostatic pressure                                                   | B / All-Ala                      | apo / A                               | 85 / 59                             |
| Ultrasonic techniques                                                  | B, H                             | A                                     | 86, 87                              |
| Interaction with molecular chaperones                                  | B, H                             | apo                                   | 88-91                               |

<sup>1</sup> ANS, 8-anilino-1-naphthalene sulfonate; CD, circular dichroism; NOE, nuclear Overhauser effect spectroscopy; CIDNP, chemically-induced dynamic nuclear polarization; EPR, electron paramagnetic resonance; HSQC, heteronuclear single quantum correlation spectroscopy; IR, infrared

<sup>2</sup> B, bovine  $\alpha$ -lactalbumin; H, human  $\alpha$ -lactalbumin; rH, recombinant human  $\alpha$ -lactalbumin (containing N-terminal Met); G, goat  $\alpha$ -lactalbumin; rG, recombinant goat  $\alpha$ -lactalbumin; GP, guinea pig  $\alpha$ -lactalbumin; [28-111], (Cys6Ala/Cys120Ala) (Cys61Ala/Cys77Ala) (Cys73Ala/Cys91Ala)-recombinant human  $\alpha$ -lactalbumin (containing a single disulfide bond between Cys28 and Cys111).

<sup>3</sup> MG, partially folded “molten globule” form; A, Acidic-state molten globule at pH 2; P, molten globule generated in moderate concentrations of denaturant (“partly-denatured”) at pH 7; apo, calcium ion-depleted molten globule at pH 7; T, high temperature molten globule at pH 7.

## References

1. Balbach, J., Forge, V., van Nuland, N. A. J., Winder, S. L., Hore, P. J. & Dobson, C. M. (1995) *Nat. Struct. Biol.* **2**, 865-870.
2. Forge, V., Wijesinha, R. T., Balbach, J., Brew, K., Robinson, C. V., Redfield, C. & Dobson, C. M. (1999) *J. Mol. Biol.* **288**, 673-688.
3. Ptitsyn, O. B., Pain, R. H., Semisotnov, G. V., Zerovnik, E. & Razgulyaev, O. I. (1990) *FEBS Lett.* **262**, 20-24.
4. Semisotnov, G. V., Rodionova, N. A., Razgulyaev, O. I., Uversky, V. N., Gripas, A. F. & Gilmanshin, R. I. (1991) *Biopolymers* **31**, 119-128.
5. Vanderheeren, G. & Hanssens, I. (1994) *J. Biol. Chem.* **269**, 7090-7094.
6. Uversky, V. N., Winter, S. & Löber, G. (1996) *Biophys. Chem.* **60**, 79-88.
7. Chakraborty, S., Ittah, V., Bai, P., Luo, L., Haas, E. & Peng, Z.-y. (2001) *Biochemistry* **40**, 7228-7238.
8. Dolgikh, D. A., Gilmanshin, R. I., Brazhnikov, E. V., Bychkova, V. E., Semisotnov, G. V., Venyaminov, S. Y. & Ptitsyn, O. B. (1981) *FEBS Lett.* **136**, 311-315.
9. Dolgikh, D. A., Abaturov, L. V., Bolotina, I. A., Brazhnikov, E. V., Bychkova, V. E., Gilmanshin, R. I., Lebedev, Y. O., Semisotnov, G. V., Tiktopulo, E. I. & Ptitsyn, O. B. (1985) *Eur. Biophys. J.* **13**, 109-121.
10. Kuwajima, K., Hiraoka, Y., Ikeguchi, M. & Sugai, S. (1985) *Biochemistry* **24**, 874-881.
11. Ikeguchi, M., Kuwajima, K., Mitani, M. & Sugai, S. (1986) *Biochemistry* **25**, 6965-6972.
12. Ikeguchi, M., Fujino, M., Kato, M., Kuwajima, K. & Sugai, S. (1998) *Protein Sci.* **7**, 1564-1574.
13. Chaudhuri, T. K., Arai, M., Terada, T. P., Ikura, T. & Kuwajima, K. (2000) *Biochemistry* **39**, 15643-15651.
14. Mizuguchi, M., Hashimoto, D., Sakurai, M. & Nitta, K. (2000) *Proteins: Struct., Funct., Genet.* **38**, 407-413.
15. Pfeil, W. (1998) *Proteins: Struct., Funct., Genet.* **30**, 43-48.
16. Ewbank, J. J. & Creighton, T. E. (1991) *Nature* **350**, 518-520.
17. Ewbank, J. J. & Creighton, T. E. (1993) *Biochemistry* **32**, 3677-3693.
18. Ewbank, J. J. & Creighton, T. E. (1993) *Biochemistry* **32**, 3694-3707.
19. Creighton, T. E. & Ewbank, J. J. (1994) *Biochemistry* **33**, 1534-1538.
20. Chang, J.-Y., Bulychov, A. & Li, L. (2000) *FEBS Lett.* **487**, 298-300.
21. Chang, J.-Y. & Li, L. (2001) *J. Biol. Chem.* **276**, 9705-9712.
22. Chang, J.-Y. (2002) *J. Biol. Chem.* **277**, 120-126.
23. Pfeil, W., Bychkova, V. E. & Ptitsyn, O. B. (1986) *FEBS Lett.* **198**, 287-291.
24. Xie, D., Bhakuni, V. & Freire, E. (1991) *Biochemistry* **30**, 10673-10678.
25. Xie, D., Bhakuni, V. & Freire, E. (1993) *J. Mol. Biol.* **232**, 5-8.
26. Griko, Y. V., Freire, E. & Privalov, P. L. (1994) *Biochemistry* **33**, 1889-1899.
27. Yutani, K., Ogasahara, K. & Kuwajima, K. (1992) *J. Mol. Biol.* **228**, 347-350.
28. Veprintsev, D. B., Permyakov, S. E., Permyakov, E. A., Rogov, V. V., Cawthorn, K. M. & Berliner, L. J. (1997) *FEBS Lett.* **412**, 625-628.
29. Griko, Y. V. & Remeta, D. P. (1999) *Protein Sci.* **8**, 554-561.
30. Peng, Z.-y. & Kim, P. S. (1994) *Biochemistry* **33**, 2136-2141.
31. Wu, L. C., Peng, Z.-y. & Kim, P. S. (1995) *Nat. Struct. Biol.* **2**, 281-286.

32. Wu, L. C. & Kim, P. S. (1997) *Proc. Natl. Acad. Sci. U. S. A.* **94**, 14314-14319.
33. Peng, Z.-y., Wu, L. C. & Kim, P. S. (1995) *Biochemistry* **34**, 3248-3252.
34. Schulman, B. A. & Kim, P. S. (1996) *Nat. Struct. Biol.* **3**, 682-687.
35. Wu, L. C. & Kim, P. S. (1998) *J. Mol. Biol.* **280**, 175-182.
36. Song, J., Bai, P., Luo, L. & Peng, Z.-y. (1998) *J. Mol. Biol.* **280**, 167-174.
37. Chakraborty, S. & Peng, Z.-y. (2000) *J. Mol. Biol.* **298**, 1-6.
38. Bai, P., Song, J., Luo, L. & Peng, Z.-y. (2001) *Protein Sci.* **10**, 55-62.
39. Saeki, K., Arai, M., Yoda, T., Nakao, M. & Kuwajima, K. (2004) *J. Mol. Biol.* **341**, 589-604.
40. Mizuguchi, M., Masaki, K. & Nitta, K. (1999) *J. Mol. Biol.* **292**, 1137-1148.
41. Mizuguchi, M., Masaki, K., Demura, M. & Nitta, K. (2000) *J. Mol. Biol.* **298**, 985-995.
42. Mizuguchi, M., Kobashigawa, Y., Kumaki, Y., Demura, M., Kawano, K. & Nitta, K. (2002) *Proteins: Struct., Funct., Genet.* **49**, 95-103.
43. Baum, J., Dobson, C. M., Evans, P. A. & Hanley, C. (1989) *Biochemistry* **28**, 7-13.
44. Alexandrescu, A. T., Evans, P. A., Pitkeathly, M., Baum, J. & Dobson, C. M. (1993) *Biochemistry* **32**, 1707-1718.
45. Shimizu, A., Ikeguchi, M. & Sugai, S. (1993) *Biochemistry* **32**, 13198-13203.
46. Alexandrescu, A. T., Broadhurst, R. W., Wormald, C., Chyan, C.-L., Baum, J. & Dobson, C. M. (1992) *Eur. J. Biochem.* **210**, 699-709.
47. Chyan, C.-L., Wormald, C., Dobson, C. M., Evans, P. A. & Baum, J. (1993) *Biochemistry* **32**, 5681-5691.
48. Schulman, B. A., Redfield, C., Peng, Z.-y., Dobson, C. M. & Kim, P. S. (1995) *J. Mol. Biol.* **253**, 651-657.
49. Wijesinha-Bettoni, R., Dobson, C. M. & Redfield, C. (2001) *J. Mol. Biol.* **307**, 885-898.
50. Improta, S., Molinari, H., Pastore, A., Consonni, R. & Zetta, L. (1995) *Eur. J. Biochem.* **227**, 87-96.
51. Berliner, L. J., Koga, K., Nishikawa, H. & Scheffler, J. E. (1987) *Biochemistry* **26**, 5769-5774.
52. Maeda, K., Lyon, C. E., Lopez, J. J., Cemazar, M., Dobson, C. M. & Hore, P. J. (2000) *J. Biomol. NMR* **16**, 235-244.
53. Hamang, M., Sanson, A., Liagre, L., Forge, V. & Berthault, P. (2000) *Rev. Sci. Instrum.* **71**, 2180-2183.
54. Kühn, T. & Schwalbe, H. (2000) *J. Am. Chem. Soc.* **122**, 6169-6174.
55. Wirmer, J., Kühn, T. & Schwalbe, H. (2001) *Angew. Chem. Int. Ed.* **40**, 4248-4251.
56. Schulman, B. A., Kim, P. S., Dobson, C. M. & Redfield, C. (1997) *Nat. Struct. Biol.* **4**, 630-634.
57. Redfield, C., Schulman, B. A., Milhollen, M. A., Kim, P. S. & Dobson, C. M. (1999) *Nat. Struct. Biol.* **6**, 948-952.
58. Wijesinha-Bettoni, R., Dobson, C. M. & Redfield, C. (2001) *J. Mol. Biol.* **312**, 261-273.
59. Lassalle, M. W., Li, H., Yamada, H., Akasaka, K. & Redfield, C. (2003) *Protein Sci.* **12**, 66-72.
60. Ramboarina, S. & Redfield, C. (2003) *J. Mol. Biol.* **330**, 1177-1188.
61. Quezada, C. M., Schulman, B. A., Froggatt, J. J., Dobson, C. M. & Redfield, C. (2004) *J. Mol. Biol.* **338**, 149-158.
62. Balbach, J., Forge, V., Lau, W. S., Jones, J. A., van Nuland, N. A. J. & Dobson, C. M. (1997) *Proc. Natl. Acad. Sci. U. S. A.* **94**, 7182-7185.
63. Kim, S., Bracken, C. & Baum, J. (1999) *J. Mol. Biol.* **294**, 551-560.
64. Denisov, V. P., Jonsson, B.-H. & Halle, B. (1999) *Nat. Struct. Biol.* **6**, 253-260.
65. Bai, P., Luo, L. & Peng, Z.-y. (2000) *Biochemistry* **39**, 372-380.
66. Lyon, C. E., Suh, E.-S., Dobson, C. M. & Hore, P. J. (2002) *J. Am. Chem. Soc.* **124**, 13018-13024.
67. Polverino de Laureto, P., De Filippis, V., Di Bello, M., Zambonin, M. & Fontana, A. (1995) *Biochemistry* **34**, 12596-12604.
68. Polverino de Laureto, P., Frare, E., Gottardo, R. & Fontana, A. (2002) *Proteins: Struct., Funct., Genet.* **49**, 385-397.
69. Polverino de Laureto, P., Frare, E., Gottardo, R., Van Dael, H. & Fontana, A. (2002) *Protein Sci.* **11**, 2932-2946.
70. Troullier, A., Reinstädler, D., Dupont, Y., Naumann, D. & Forge, V. (2000) *Nat. Struct. Biol.* **7**, 78-86.
71. Last, A. M., Schulman, B. A., Robinson, C. V. & Redfield, C. (2001) *J. Mol. Biol.* **311**, 909-919.
72. Demarest, S. J., Fairman, R. & Raleigh, D. P. (1998) *J. Mol. Biol.* **283**, 279-291.
73. Demarest, S. J., Hua, Y. & Raleigh, D. P. (1999) *Biochemistry* **38**, 7380-7387.
74. Demarest, S. J., Horng, J.-C. & Raleigh, D. P. (2001) *Proteins: Struct., Funct., Genet.* **42**, 237-242.
75. Demarest, S. J., Zhou, S.-Q., Robblee, J., Fairman, R., Chu, B. & Raleigh, D. P. (2001) *Biochemistry* **40**, 2138-2147.
76. Chowdhury, F. A. & Raleigh, D. P. (2005) *Protein Sci.* **14**, 89-96.
77. Wilson, G., Ford, S. J., Cooper, A., Hecht, L., Wen, Z. Q. & Barron, L. D. (1995) *J. Mol. Biol.* **254**, 747-760.
78. Wilson, G., Hecht, L. & Barron, L. D. (1996) *J. Mol. Biol.* **261**, 341-347.
79. Barron, L. D., Hecht, L., Blanch, E. W. & Bell, A. F. (2000) *Prog. Biophys. Mol. Biol.* **73**, 1-49.
80. Kataoka, M., Kuwajima, K., Tokunaga, F. & Goto, Y. (1997) *Protein Sci.* **6**, 422-430.

81. Arai, M., Ito, K., Inobe, T., Nakao, M., Maki, K., Kamagata, K., Kihara, H., Amemiya, Y. & Kuwajima, K. (2002) *J. Mol. Biol.* **321**, 121-132.
82. Bu, Z., Cook, J. & Callaway, D. J. E. (2001) *J. Mol. Biol.* **312**, 865-873.
83. Lala, A. K. & Kaul, P. (1992) *J. Biol. Chem.* **267**, 19914-19918.
84. D'Silva, P. R. & Lala, A. K. (1999) *Protein Sci.* **8**, 1099-1103.
85. Kobashigawa, Y., Sakurai, M. & Nitta, K. (1999) *Protein Sci.* **8**, 2765-2772.
86. Nölting, B., Jiang, M. & Sligar, S. G. (1993) *J. Am. Chem. Soc.* **115**, 9879-9882.
87. Kharakoz, D. P. & Bychkova, V. E. (1997) *Biochemistry* **36**, 1882-1890.
88. Okazaki, A., Ikura, T., Nikaido, K. & Kuwajima, K. (1994) *Nat. Struct. Biol.* **1**, 439-446.
89. Hayer-Hartl, M. K., Ewbank, J. J., Creighton, T. E. & Hartl, F.-U. (1994) *EMBO J.* **13**, 3192-3202.
90. Ewbank, J. J., Creighton, T. E., Hayer-Hartl, M. K. & Hartl, F.-U. (1995) *Nat. Struct. Biol.* **2**, 10.
91. Okazaki, A., Ikura, T. & Kuwajima, K. (1995) *Nat. Struct. Biol.* **2**, 10-11.
