# Supplementary material
Source: PubMed Central journal article supplement (PMC1157025)
Supplement: pnas_0500661102_5.pdf [file pnas_0500661102_5.pdf]

|     | BLA                                                                                        | HLA                                         |
|-----|--------------------------------------------------------------------------------------------|---------------------------------------------|
| A   | <p>Sidechain<br/>Inaccessible<br/>Accessible</p> <p>Y18-W26-Y36-Y50-W60-Y103-W104-W118</p> | <p>Y18-(L26)-Y36-Y50-W60-Y103-W104-W118</p> |
| P   | <p>Y18-W26-Y36-Y50-W60-Y103-W104-W118</p>                                                  | <p>Y18-(L26)-Y36-Y50-W60-Y103-W104-W118</p> |
| Apo | <p>Y18-W26-Y36-Y50-W60-Y103-W104-W118</p>                                                  | <p>Y18-(L26)-Y36-Y50-W60-Y103-W104-W118</p> |
