# Supplementary material
Source: PubMed Central journal article supplement (PMC1157025)

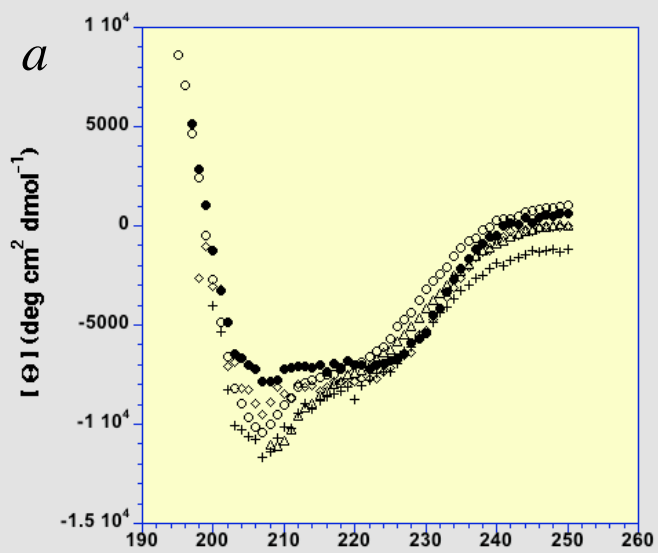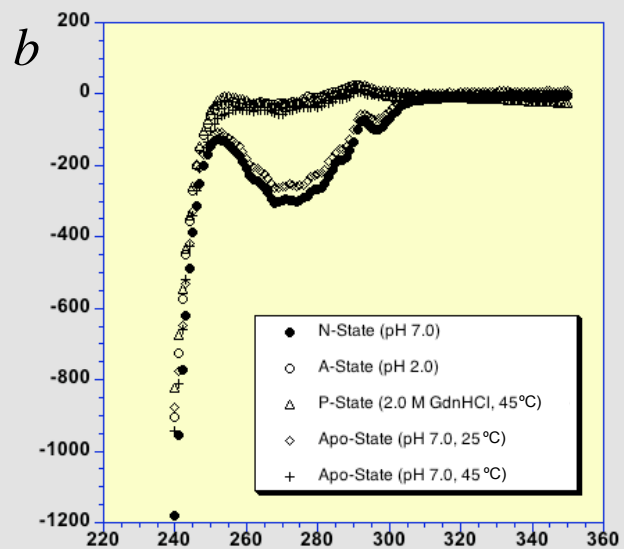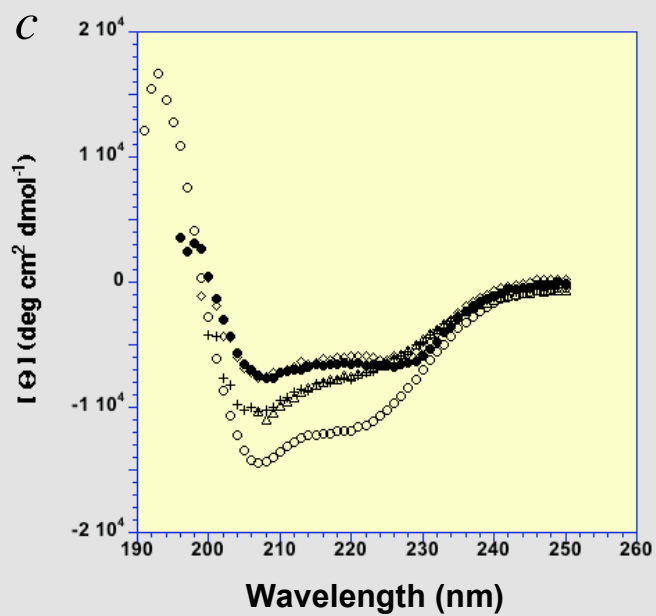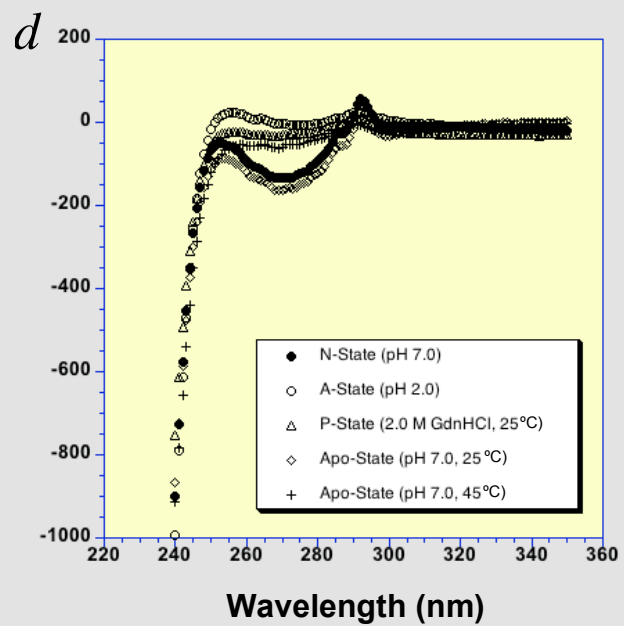

Supplement: pnas_0500661102_2.pdf [file pnas_0500661102_2.pdf]

$^1\text{H}$  spectrum

CIDNP spectrum

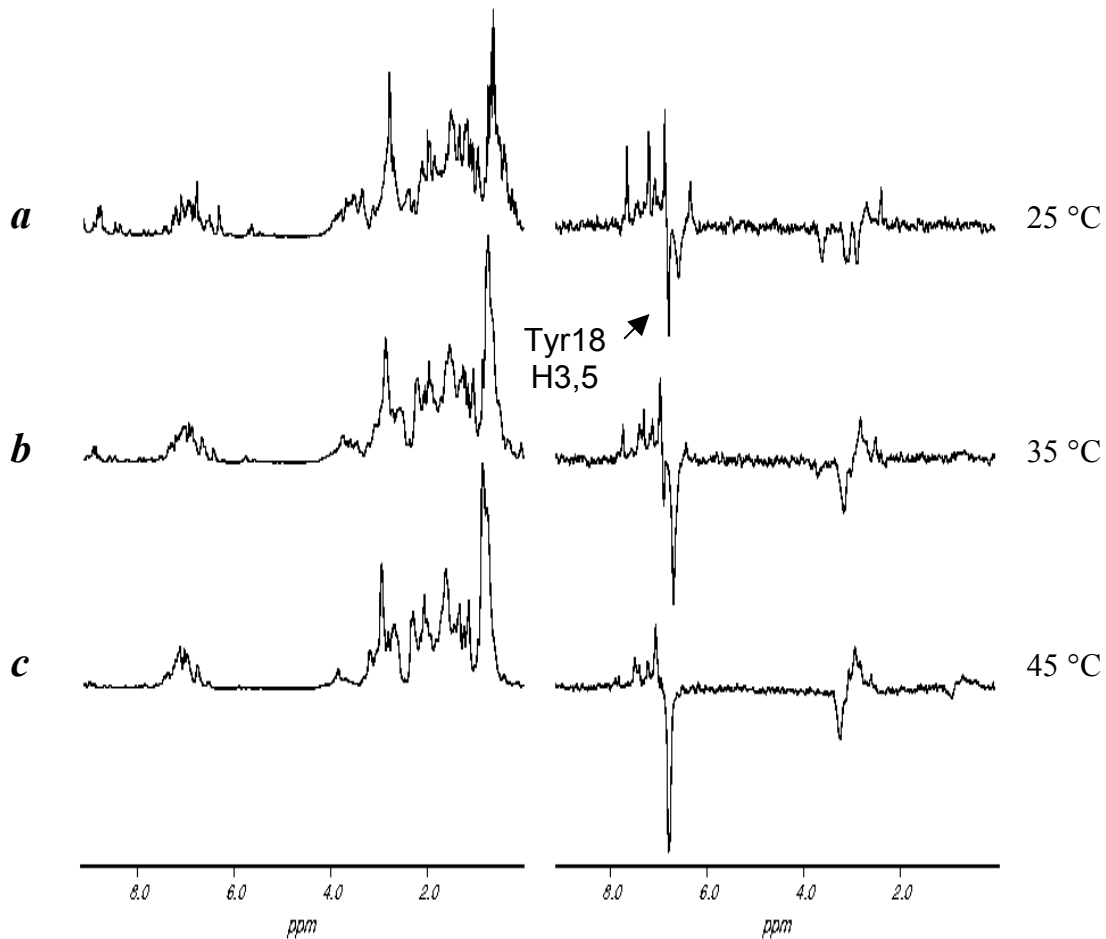

Supplement: pnas_0500661102_4.pdf [file pnas_0500661102_4.pdf]

Fig. 8.

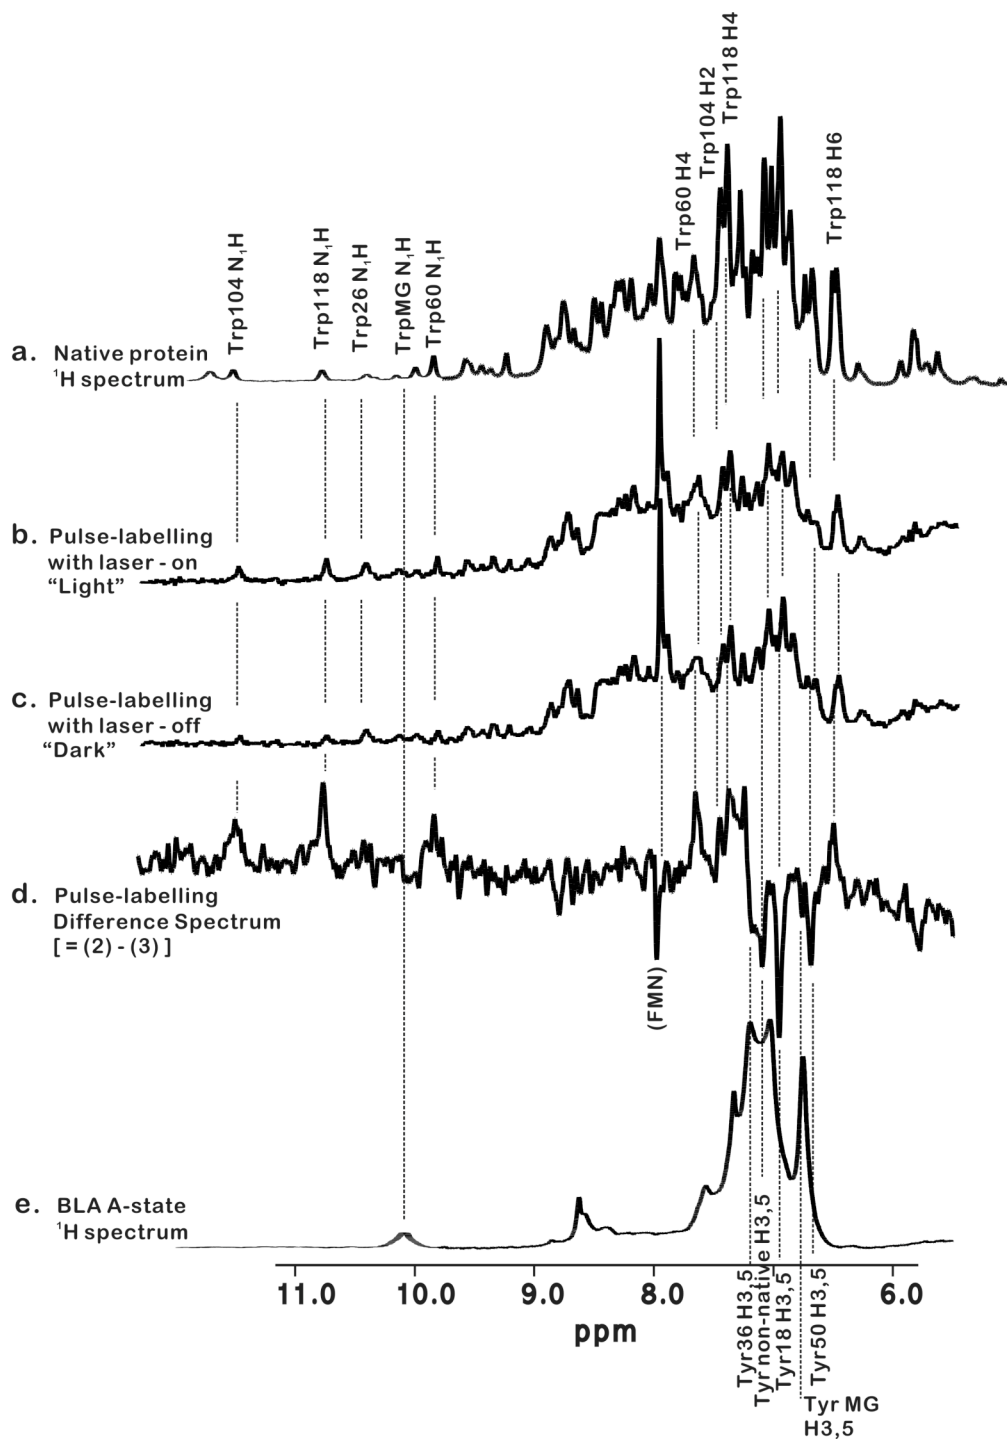

Supplement: pnas_0500661102_6.pdf [file pnas_0500661102_6.pdf]
